# Supplementary material for: Selective hydrogenation of high concentration acetylene over the well-defined crystalline sites of Pd1Cu1 and Pd1Cu3
Source: Royal Society of Chemistry journal article supplement (doi:10.1039/d4cy00363b), 2024-01-01
Supplement: d4cy00363b1.pdf [file d4cy00363b1.pdf]

## **Supporting Information:**

### **Selective hydrogenation of high concentration acetylene over the well-defined crystalline sites of Pd<sub>1</sub>Cu<sub>1</sub> and Pd<sub>1</sub>Cu<sub>3</sub>**

Junqi Pei, Yamei Xu, Qiuchen Yang, Ruijun Hou\*

Beijing Key Laboratory for Chemical Power Source and Green Catalysis, School of Chemistry and  
Chemical Engineering, Beijing Institute of Technology, Beijing, 100081, People's Republic of  
China

*\*Corresponding author: [hourj@bit.edu.cn](mailto:hourj@bit.edu.cn)*

## Contents

Figure S1. TEM images and EDS elemental mapping of the unsupported nanoparticles: (a-e) Pd<sub>1</sub>Cu<sub>1</sub>(NS) and (f-j) Pd<sub>1</sub>Cu<sub>3</sub>(NS).

Figure S2. TG profiles of the as-synthesized nanoparticles without calcination treatment.

Figure S3. XRD patterns of the PdCu/SiO<sub>2</sub>(WI) catalysts.

Figure S4. CuLMM Auger spectra of the reduced catalysts.

Figure S5. Acetylene conversion as a function of reaction temperature.

Figure S6. Selectivity of (a) ethylene, (b) ethane, (c) oligomer at the different temperature in acetylene hydrogenation.

Figure S7. The 1,3-butadiene selectivity over different catalysts with (a) conversion and (b) temperature.

Figure S8. Ethylene yield for different catalysts at different reaction temperature.

Figure S9. The reaction transition states on Pd(111).

Figure S10. The reaction transition states on Pd<sub>1</sub>Cu<sub>1</sub>(111).

Figure S11. The reaction transition states on Pd<sub>1</sub>Cu<sub>3</sub>(111).

Table S1. XRD peak deconvolution results of the PdCu/SiO<sub>2</sub>(WI) catalysts.

Table S2. Ethylene selectivity, TOFs and ln(TOFs) (based on Pd loading and surface site normalization) for different catalysts at low conversions.

Table S3. The optimized adsorption patterns of the reaction intermediates on Pd(111), Pd<sub>1</sub>Cu<sub>1</sub>(111), Pd<sub>1</sub>Cu<sub>3</sub>(111) surface.

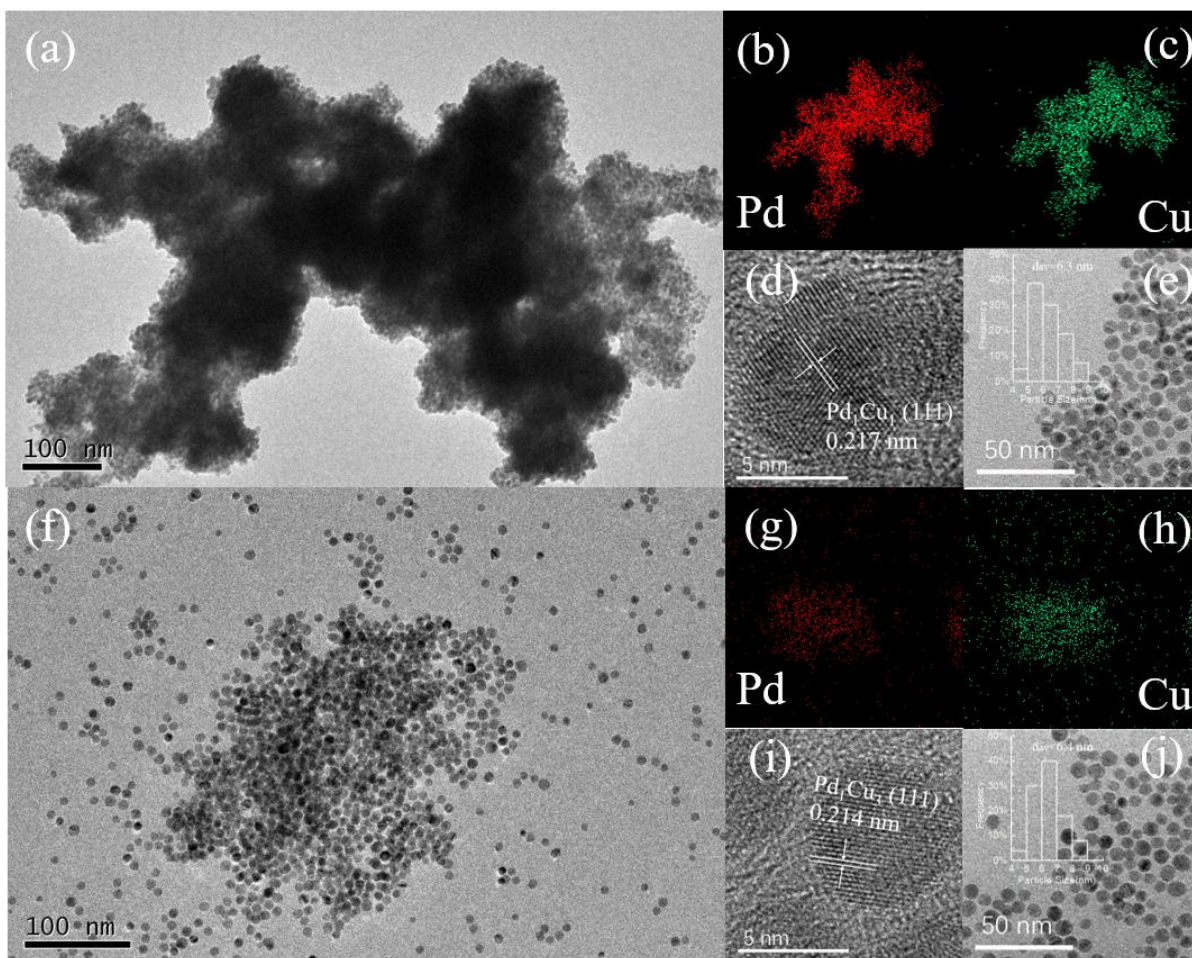

Figure S1. TEM images and EDS elemental mapping of the unsupported nanoparticles: (a-e) Pd<sub>1</sub>Cu<sub>1</sub>(NS) and (f-j) Pd<sub>1</sub>Cu<sub>3</sub>(NS).

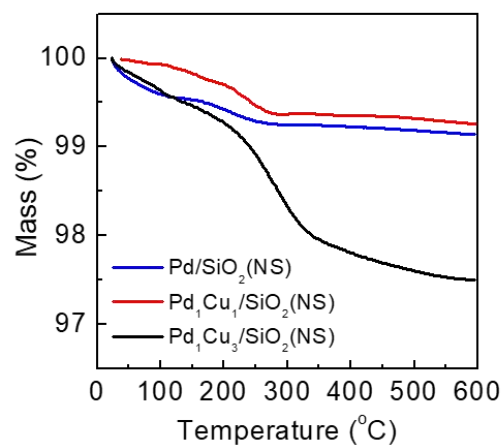

Figure S2. TG profiles of the as-synthesized nanoparticles without calcination treatment.

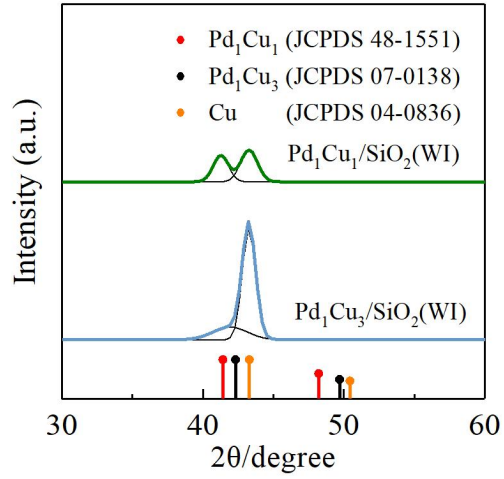

Figure S3. XRD patterns of the PdCu/SiO<sub>2</sub>(WI) catalysts.

Table S1. XRD peak deconvolution results of the PdCu/SiO<sub>2</sub>(WI) catalysts.

|                                                        | Alloy phases                            |        | Cu            |        |
|--------------------------------------------------------|-----------------------------------------|--------|---------------|--------|
|                                                        | Peak position                           | Area % | Peak position | Area % |
| Pd <sub>1</sub> Cu <sub>1</sub> /SiO <sub>2</sub> (WI) | 41.4 (Pd <sub>1</sub> Cu <sub>1</sub> ) | 43.0   | 43.3          | 57.0   |
| Pd <sub>1</sub> Cu <sub>3</sub> /SiO <sub>2</sub> (WI) | 42.3 (Pd <sub>1</sub> Cu <sub>3</sub> ) | 23.0   | 43.3          | 77.0   |

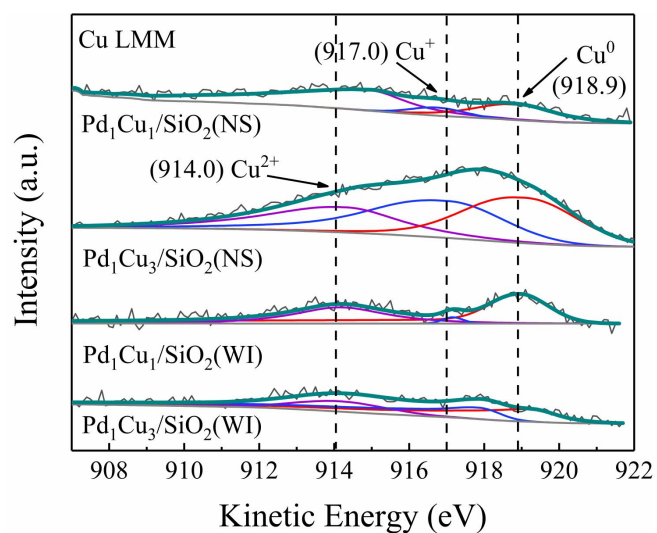

Figure S4. CuLMM Auger spectra of the reduced catalysts.

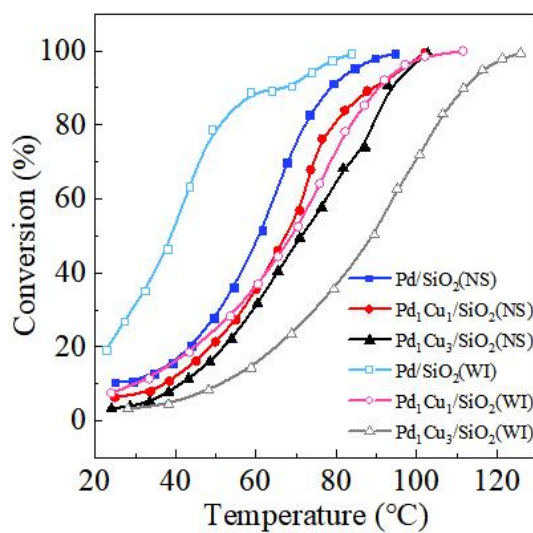

Figure S5. Acetylene conversion as a function of reaction temperature.

Table S2. Ethylene selectivity, TOFs and ln(TOFs) (based on Pd loading and surface site normalization) for different catalysts at low conversions.

| Catalyst                                               | Temperature (°C) | Conversion (%) | C <sub>2</sub> H <sub>4</sub> selectivity (%) | TOF/Pd loading (S <sup>-1</sup> ) | TOF/surface site (S <sup>-1</sup> ) | ln(TOF)/Pd loading (S <sup>-1</sup> ) | ln(TOF)/surface site (S <sup>-1</sup> ) |
|--------------------------------------------------------|------------------|----------------|-----------------------------------------------|-----------------------------------|-------------------------------------|---------------------------------------|-----------------------------------------|
| Pd/SiO <sub>2</sub> (WI)                               | 22.7             | 19.2           | 47.8                                          | 0.1                               | 10.5                                | -1.9                                  | 2.3                                     |
|                                                        | 26.3             | 25.0           | 47.3                                          | 0.2                               | 13.7                                | -1.7                                  | 2.6                                     |
|                                                        | 31.3             | 33.2           | 48.4                                          | 0.3                               | 18.2                                | -1.4                                  | 2.9                                     |
|                                                        | 32.3             | 35.2           | 47.4                                          | 0.3                               | 19.2                                | -1.3                                  | 3.0                                     |
| Pd <sub>1</sub> Cu <sub>1</sub> /SiO <sub>2</sub> (WI) | 23.9             | 7.5            | 50.2                                          | 0.06                              | 2.1                                 | -2.8                                  | 0.7                                     |
|                                                        | 33.4             | 11.4           | 50.8                                          | 0.09                              | 3.2                                 | -2.4                                  | 1.2                                     |
|                                                        | 43.4             | 18.5           | 50.3                                          | 0.1                               | 5.2                                 | -1.9                                  | 1.6                                     |
|                                                        | 53.6             | 28.3           | 49.7                                          | 0.2                               | 7.9                                 | -1.5                                  | 2.1                                     |
| Pd <sub>1</sub> Cu <sub>3</sub> /SiO <sub>2</sub> (WI) | 38.2             | 4.4            | 50.7                                          | 0.03                              | 1.6                                 | -3.4                                  | 0.5                                     |
|                                                        | 48.2             | 8.2            | 49.5                                          | 0.06                              | 2.9                                 | -2.8                                  | 1.1                                     |
|                                                        | 58.8             | 14.3           | 50.8                                          | 0.1                               | 5.1                                 | -2.2                                  | 1.6                                     |
|                                                        | 68.9             | 23.5           | 49.5                                          | 0.2                               | 8.4                                 | -1.7                                  | 2.1                                     |
| Pd/SiO <sub>2</sub> (NS)                               | 29.3             | 10.5           | 51.3                                          | 0.2                               | 8.4                                 | -1.6                                  | 2.1                                     |
|                                                        | 34.4             | 13.4           | 50.4                                          | 0.3                               | 10.7                                | -1.4                                  | 2.4                                     |
|                                                        | 43.9             | 20.3           | 51.7                                          | 0.4                               | 16.2                                | -0.9                                  | 2.8                                     |
|                                                        | 49.1             | 26.9           | 50.2                                          | 0.5                               | 21.5                                | -0.7                                  | 3.1                                     |
| Pd <sub>1</sub> Cu <sub>1</sub> /SiO <sub>2</sub> (NS) | 28.8             | 6.1            | 53.9                                          | 0.1                               | 6.2                                 | -2.4                                  | 1.8                                     |
|                                                        | 38.5             | 10.7           | 51.7                                          | 0.2                               | 10.8                                | -1.8                                  | 2.4                                     |
|                                                        | 45.1             | 16.2           | 50.1                                          | 0.3                               | 16.3                                | -1.4                                  | 2.8                                     |
|                                                        | 55               | 27.3           | 50.2                                          | 0.4                               | 27.6                                | -0.9                                  | 3.3                                     |
| Pd <sub>1</sub> Cu <sub>3</sub> /SiO <sub>2</sub> (NS) | 28.6             | 3.9            | 50.8                                          | 0.04                              | 2.0                                 | -3.3                                  | 0.7                                     |
|                                                        | 38.3             | 7.8            | 44.2                                          | 0.08                              | 4.0                                 | -2.6                                  | 1.4                                     |
|                                                        | 48.5             | 16.0           | 41.4                                          | 0.2                               | 8.1                                 | -1.9                                  | 2.1                                     |
|                                                        | 53.9             | 22.1           | 41.8                                          | 0.2                               | 11.2                                | -1.5                                  | 2.4                                     |

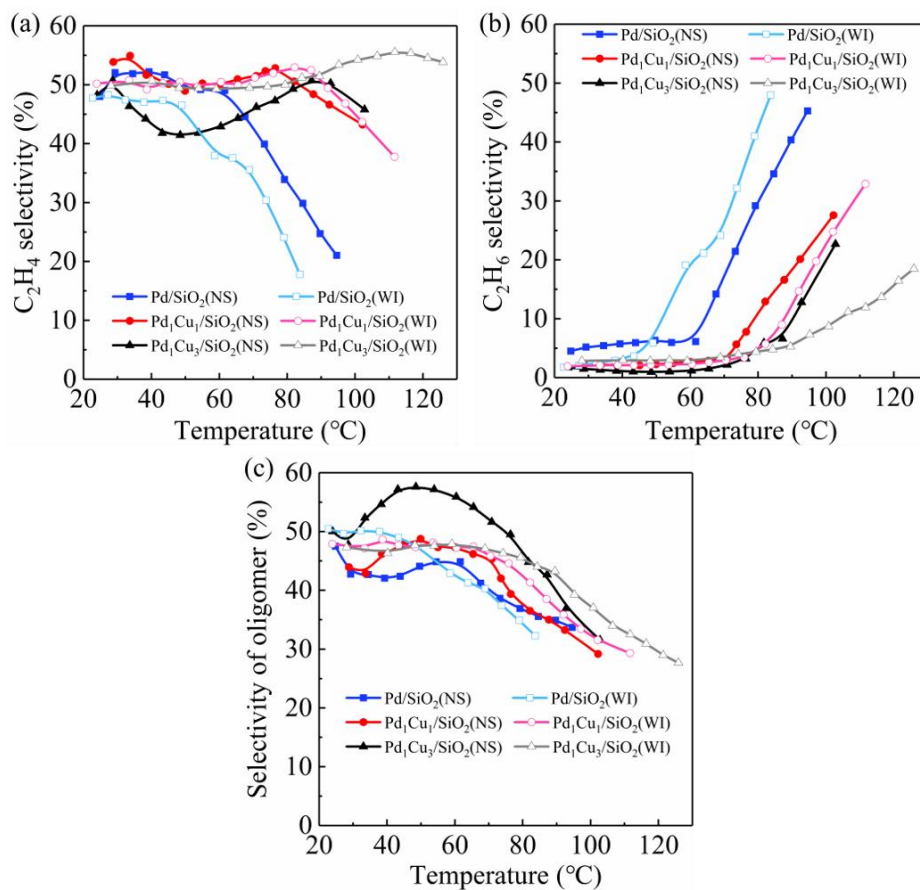

Figure S6. Selectivity of (a) ethylene, (b) ethane, (c) oligomer at the different temperature in acetylene hydrogenation.

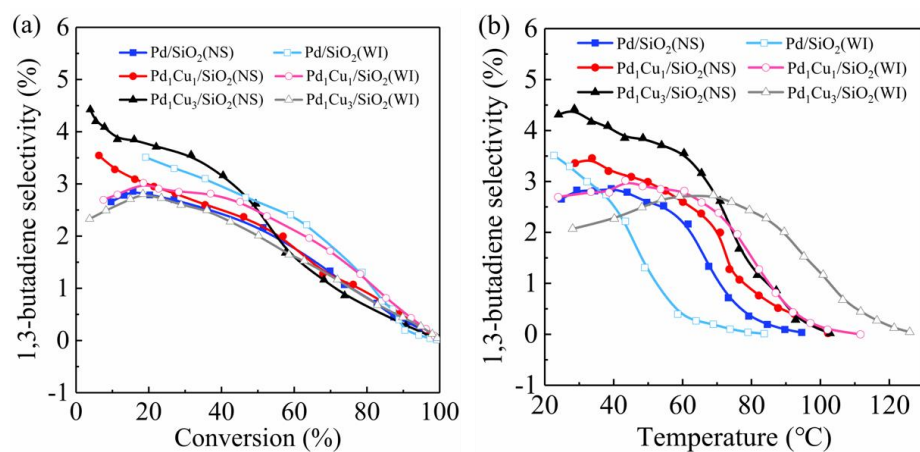

Figure S7. The 1,3-butadiene selectivity over different catalysts with (a) conversion and (b) temperature.

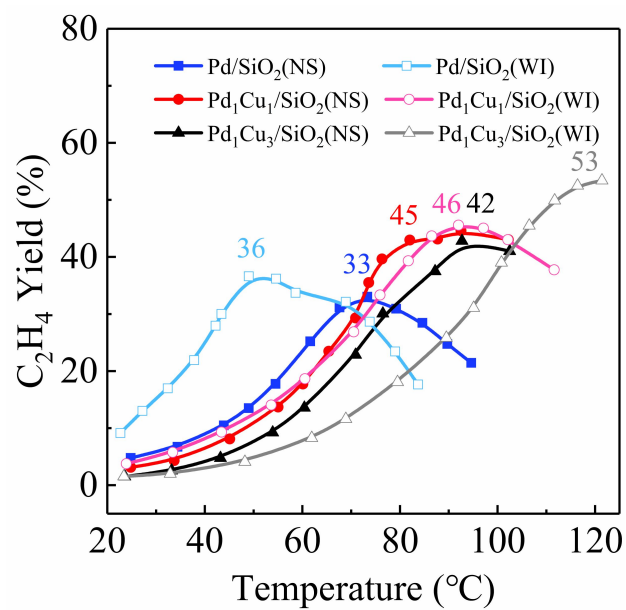

Figure S8. Ethylene yield for different catalysts at different reaction temperature.



Table S3. The optimized adsorption patterns of the reaction intermediates on Pd (111), Pd<sub>1</sub>Cu<sub>1</sub>(111), Pd<sub>1</sub>Cu<sub>3</sub> (111) surface.

|                                       | H*                                                                                | C <sub>2</sub> H <sub>2</sub> *                                                   | C <sub>2</sub> H <sub>3</sub> *                                                   | C <sub>2</sub> H <sub>4</sub> *                                                    | C <sub>2</sub> H <sub>5</sub> *                                                     | C <sub>2</sub> H <sub>6</sub> *                                                     |
|---------------------------------------|-----------------------------------------------------------------------------------|-----------------------------------------------------------------------------------|-----------------------------------------------------------------------------------|------------------------------------------------------------------------------------|-------------------------------------------------------------------------------------|-------------------------------------------------------------------------------------|
| Pd (111)                              | 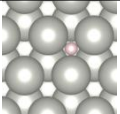 |  |  |  |  |  |
| <i>E</i> <sub>ads</sub> /eV           | -2.82                                                                             | -1.40                                                                             | -2.37                                                                             | -0.77                                                                              | -1.54                                                                               | 1.09                                                                                |
| Pd <sub>1</sub> Cu <sub>1</sub> (111) |  |  |  |  |  |  |
| <i>E</i> <sub>ads</sub> /eV           | -2.68                                                                             | -0.78                                                                             | -2.06                                                                             | -0.59                                                                              | -1.56                                                                               | -0.33                                                                               |
| Pd <sub>1</sub> Cu <sub>3</sub> (111) |  |  |  |  |  |  |
| <i>E</i> <sub>ads</sub> /eV           | -2.45                                                                             | -0.50                                                                             | -1.85                                                                             | -0.47                                                                              | -0.98                                                                               | -0.24                                                                               |

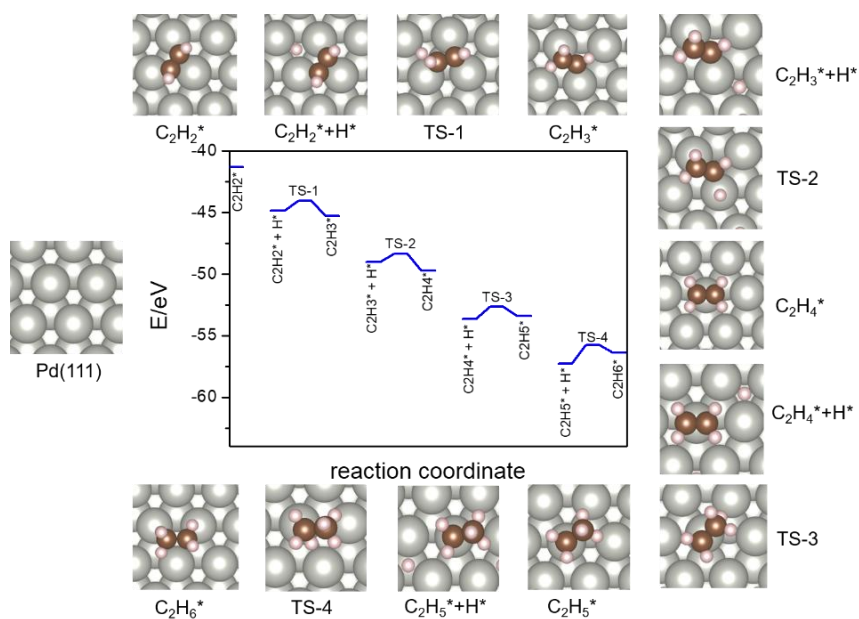

Figure S9. The reaction transition states on Pd(111).

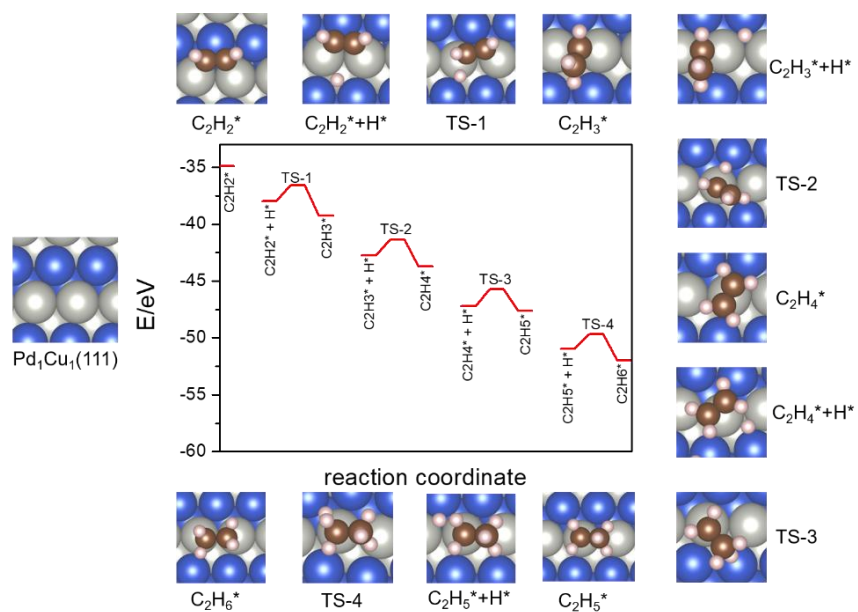

Figure S10. The reaction transition states on  $\text{Pd}_1\text{Cu}_1(111)$ .

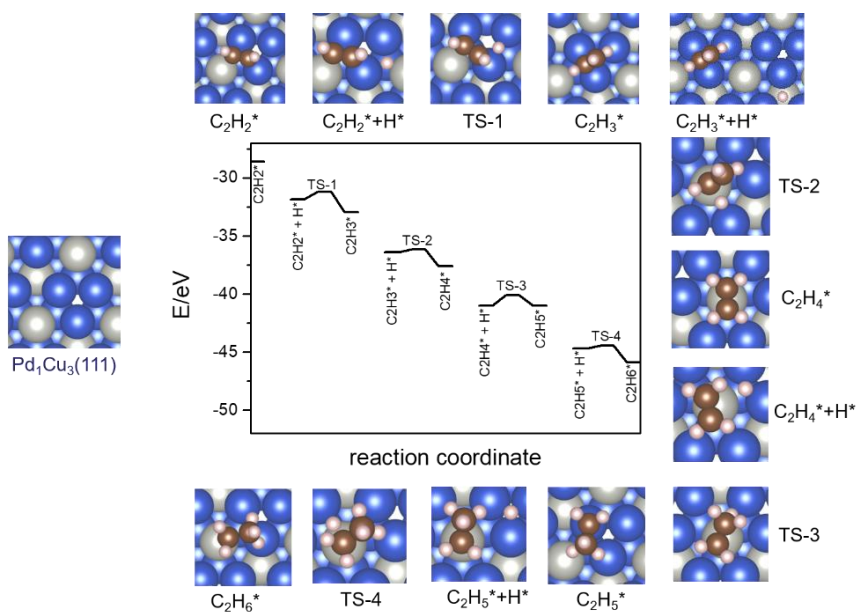

Figure S11. The reaction transition states on  $\text{Pd}_1\text{Cu}_3(111)$ .
